# Supplementary material for: Cobalt sandwich-stabilized rhodium nanocatalysts for ammonia borane and tetrahydroxydiboron hydrolysis
Source: Royal Society of Chemistry journal article supplement (doi:10.1039/d2qi01313d), 2022-01-01
Supplement: d2qi01313d1.pdf [file d2qi01313d1.pdf]

## ELECTRONIC SUPPLEMENTARY INFORMATION

### Cobalt sandwich-stabilized rhodium nanocatalysts for ammonia borane and tetrahydroxydiboron hydrolysis

Qiuxia Zhao,<sup>a,b</sup> Bruno Espuche,<sup>c,d</sup> Naixin Kang,<sup>a</sup> Sergio Moya<sup>c</sup> and Didier Astruc<sup>a,\*</sup>

<sup>a</sup> ISM, UMR CNRS N° 5255, Univ. Bordeaux, 33405 Talence Cedex, France.

<sup>b</sup> LCC, CNRS & Univ. Toulouse III, 205 Route de Narbonne, 31077 Toulouse Cedex, France.

<sup>c</sup> Soft Matter Nanotechnology Lab, CIC biomaGUNE, Paseo Miramón 182. 20014. Donostia-San Sebastián, Gipuzkoa, Spain.

<sup>d</sup> POLYMAT, Applied Chemistry Department, Faculty of Chemistry, University of the Basque Country, UPV/EHU, Paseo Manuel de Lardizabal 3, Donostia-San Sebastián, 20018, Spain

#### Contents

|                                                                                                                       |     |
|-----------------------------------------------------------------------------------------------------------------------|-----|
| Contents .....                                                                                                        | S1  |
| 1. General data .....                                                                                                 | S2  |
| 2. Synthesis of TMNP and TMNP* .....                                                                                  | S2  |
| 3. Characterization of TMNPs and TMNP* .....                                                                          | S7  |
| 4. H <sub>2</sub> evolution from B <sub>2</sub> (OH) <sub>4</sub> and AB hydrolysis catalysed by TMNP and TMNP* ..... | S8  |
| 5. Mechanistic studies of AB hydrolysis catalysed by RhNP* .....                                                      | S13 |
| 6. References .....                                                                                                   | S14 |

## 1. General data

All solvents and chemicals were used as purchased. Before usage, all the flasks were washed with a solution of aqua regia (HCl/HNO<sub>3</sub> = 3:1 v/v) in order to avoid metal residues. Milli-Q water (18.2 MΩ) was used for all the nanoparticle preparations.

--**NMR spectra** were recorded at 25 °C with a Bruker AC 300 MHz. All the chemical shifts are reported in parts per million ( $\delta$ , ppm) with reference to Me<sub>4</sub>Si for the <sup>1</sup>H NMR spectra.

--**Transmission Electron Microscopy (TEM)** were recorded on TEM JEOL JEM 1400 (120 kV) - 2100F.

**UV-vis. spectrum** was recorded using a Perkin-Elmer Lambda 19 UV-vis. spectrometer.

--**X-ray photoelectron spectra (XPS)** were performed in a SPECS Sage HR 100 spectrometer with a non-monochromatic X-ray source (magnesium K $\alpha$  line of 1253.6 eV energy and 252 W)

**Mass Spectrometer** was performed by the CESAMO on a Thermo Trace GC ultra-gas chromatograph coupled to a Thermo ISQ mass detector.

## 2. Synthesis of TMNP and TMNP\*

### Preparation of [Co( $\eta^5$ -C<sub>5</sub>Me<sub>5</sub>) ( $\eta^4$ -C<sub>5</sub>H<sub>6</sub>)]

NaBH<sub>4</sub> (189.2 mg, 5 mmol) was added into the THF solution of Cp\*CoCpPF<sub>6</sub><sup>1</sup> (202 mg, 0.5 mmol) in N<sub>2</sub> and subsequently, the color of the solution changed from yellow to orange to red, indicating the formation of the **2** (Equation S1). Overnight, THF was removed *in vacuo*, and 20 ml pentane was injected to dissolve **2**. Finally, **2** was purified by cannula

filtration to get the product as red solid. The yield of **2** is 90%. The formation of  $[\text{Co}(\eta^5\text{-C}_5\text{Me}_5)(\eta^4\text{-C}_5\text{H}_6)]$  is confirmed by  $^1\text{H}$  NMR,  $^{13}\text{C}$  NMR, FT-IR and mass spectrum.

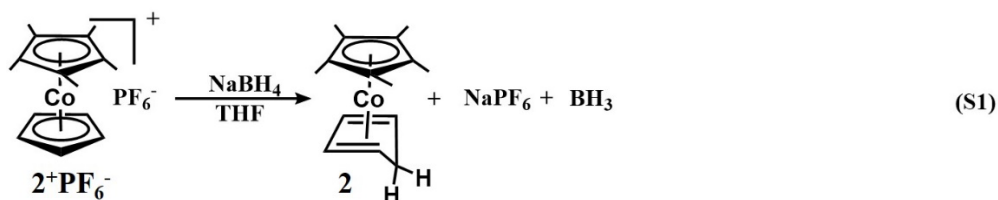

**NMR:** A few accurate NMR spectra of  $\pi$ -cyclopentadiene complexes (bonded in a tetra-hapto fashion) have been published.<sup>2, 3</sup> To assign the proton peaks, deuterated  $[\text{Co}(\eta^5\text{-C}_5\text{Me}_5)(\eta^4\text{-C}_5\text{H}_5\text{D})]$  was produced by reduction of  $2^+\text{PF}_6^-$  with  $\text{NaBD}_4$  for comparison with **2**. As shown in Figure S1, the signal at 1.55 ppm disappears for deuterated  $2^{\text{D}}$ , indicating that the signal can be assigned to the *exo*-H ( $\text{H}_4$ ) of the cobalt complex **2**.

Subsequently, the peaks at 4.33 ppm, 2.01 ppm, 1.53 ppm and 0.83 ppm are assigned to  $\text{H}_2$ ,  $\text{H}_1$ ,  $\text{H}_5$  and  $\text{H}_3$ . (Figure S1). The signal at 1.74 ppm is assigned to impurity.  $^{13}\text{C}$  NMR in Figure S2 shows peaks at 80.49 ppm, 49.88 ppm, 17.47 ppm, 14.13 ppm, 11.98 ppm, corresponding to  $-\text{CH}_3$ ,  $-\text{C}_5\text{Me}_5$  and the three C signals in cyclopentadiene.

**MS:** the mass spectrum shows a weak molecular peak at  $m/e$  260.1 and the base peak at  $m/e$  259.1. (Figure S3) The former peak corresponds to the compound **2**, while the latter peak is assigned to the hydride loss of compound **2** and the formation of stable pentamethylcobalticenium cation  $2^+$ .

**FT-IR:** in the FT-IR spectrum of **2**, there is a characteristic band of  $\pi\text{-C}_5\text{H}_5\text{-metal}$  groups, including a single C-H stretching band at  $3097\text{cm}^{-1}$ . The bands

at  $2960\text{ cm}^{-1}$ ,  $2891\text{ cm}^{-1}$  corresponds to the aliphatic C-H stretching frequencies. Comparing with the cationic  $2^+\text{PF}_6^-$ , **2** shows an unusual band at  $2736\text{ cm}^{-1}$  and  $2614\text{ cm}^{-1}$ , attributed to the C-H<sub>endo</sub> and C-H<sub>exo</sub> stretching frequency, owing to a steric and electrostatic interactions between Co and H<sub>endo</sub> / H<sub>exo</sub>.<sup>2</sup> The bands at  $1443\sim 1316\text{ cm}^{-1}$  are recognized as the C-C stretching frequency for the cyclopentadienyl ring. (Figure S4)<sup>5</sup>

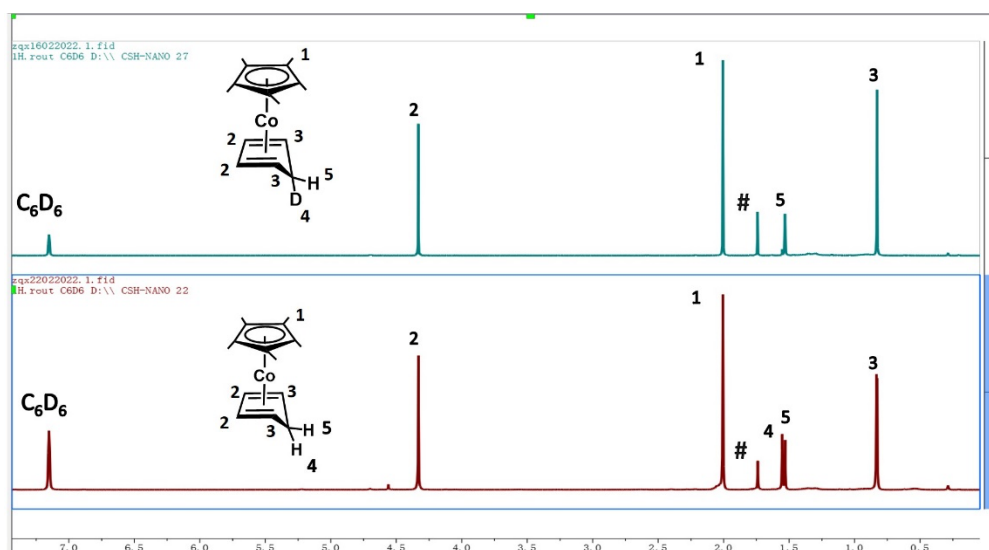

**Figure S 1.** <sup>1</sup>H NMR of [Co(η<sup>5</sup>-C<sub>5</sub>Me<sub>5</sub>)(η<sup>4</sup>-C<sub>5</sub>H<sub>6</sub>)] and [Co(η<sup>5</sup>-C<sub>5</sub>Me<sub>5</sub>)(η<sup>4</sup>-C<sub>5</sub>H<sub>5</sub>D)]: <sup>1</sup>H NMR (300 MHz, C<sub>6</sub>D<sub>6</sub>).

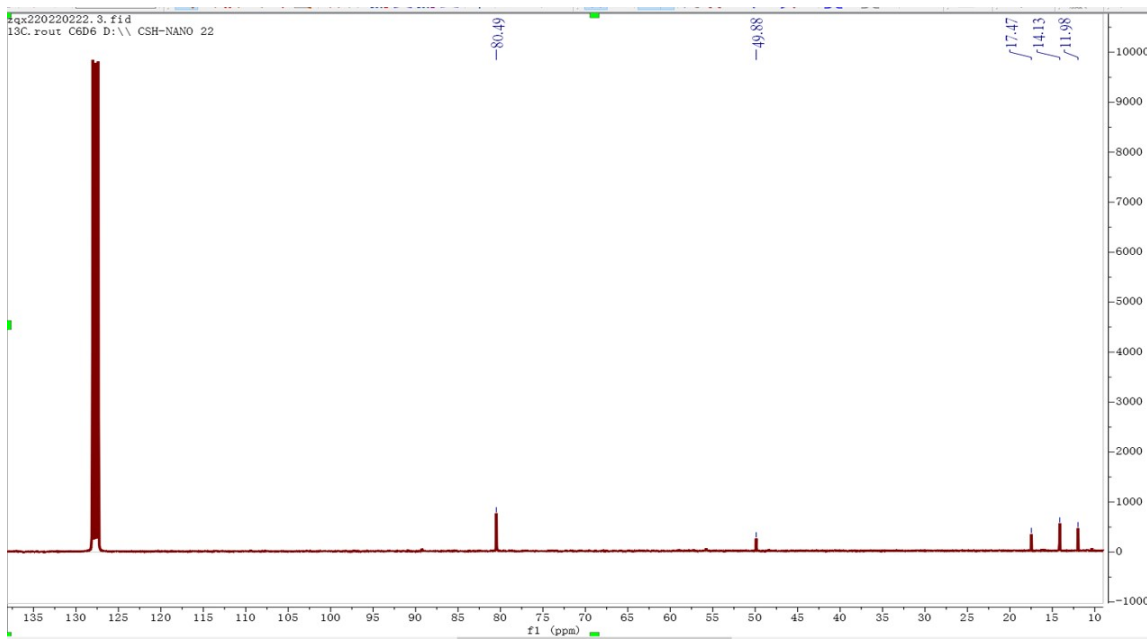

**Figure S 2.**  $^{13}\text{C}$  NMR of  $[\text{Co}(\eta^5\text{-C}_5\text{Me}_5)(\eta^4\text{-C}_5\text{H}_6)]$ , **2**:  $^{13}\text{C}$  NMR (300 MHz,  $\text{C}_6\text{D}_6$ ).

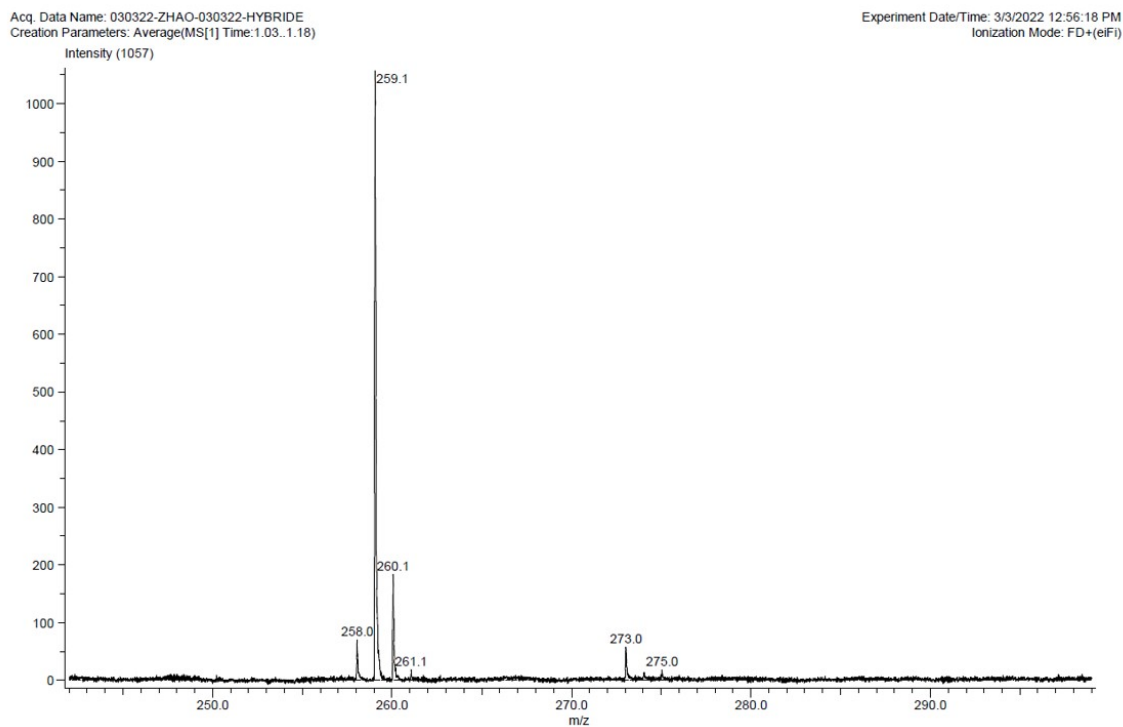

**Figure S 3.** MS spectrum of  $[\text{Co}(\eta^5\text{-C}_5\text{Me}_5)(\eta^4\text{-C}_5\text{H}_6)]$ , **2**

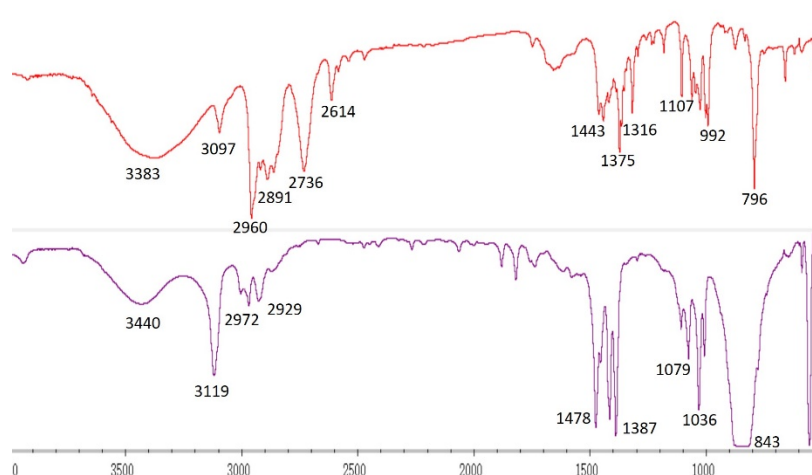

**Figure S 4.** FT-IR spectrum of  $[\text{Co}(\eta^5\text{-C}_5\text{Me}_5)(\eta^4\text{-C}_5\text{H}_6)]$ , **2**, (upper) and  $[\text{Co}(\eta^5\text{-C}_5\text{Me}_5)(\eta^5\text{-C}_5\text{H}_5)]^+\text{PF}_6^-$ , **4**, (bottom)

### Preparation of $[\text{Co}(\eta^5\text{-C}_5\text{H}_5)(\eta^4\text{-C}_5\text{H}_6)]$ , **1**

$\text{NaBH}_4$  (189.2 mg, 5 mmol) was added into the THF solution of  $\text{CpCoCpPF}_6$  (167 mg, 0.5 mmol) in  $\text{N}_2$  and, immediately, the color of the solution changed from yellow to red, indicating the formation of **1** (Equation **S2**).<sup>2, 6-8</sup> 2h later, THF was removed *in vacuo*, and 20 ml pentane was injected to dissolve **1**. Finally, **1** was purified by cannula filtration to get the compound as red solid. The yield of **1** was 90%.

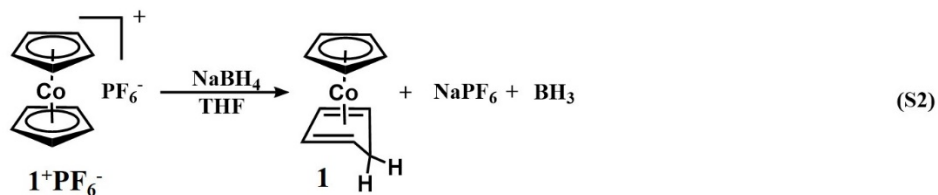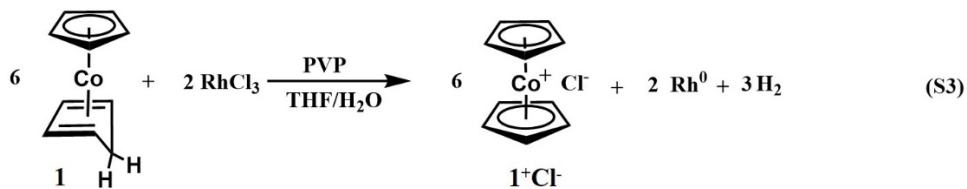

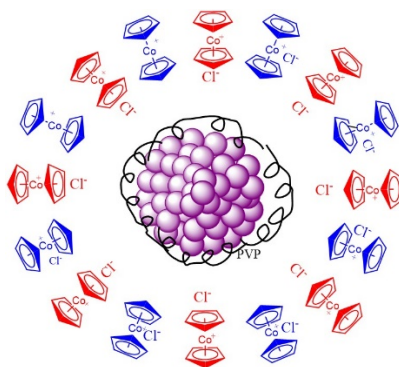

**Figure S 5.** Schematic illustration of RhNP upon reduction of  $\text{RhCl}_3$  by  $[\text{Co}(\eta^5\text{-C}_5\text{H}_5)(\eta^4\text{-C}_5\text{H}_6)]$ , **1**. The red color shows coordination of  $\text{Cl}^-$  to the NP core, and the blue color shows metalocenylium chloride without coordination (corresponding to Rh atoms in the core that are not surface atoms).

### 3. Characterization of the TMNPs and TMNP\*

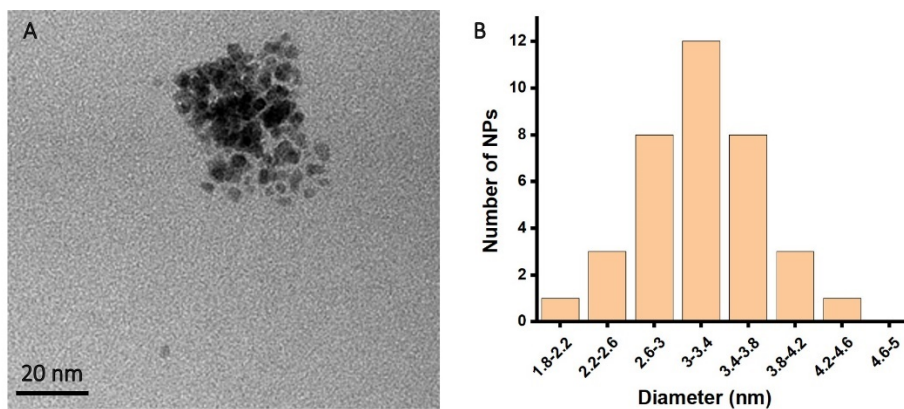

**Figure S 6.** TEM images and size distribution of the RhNP.

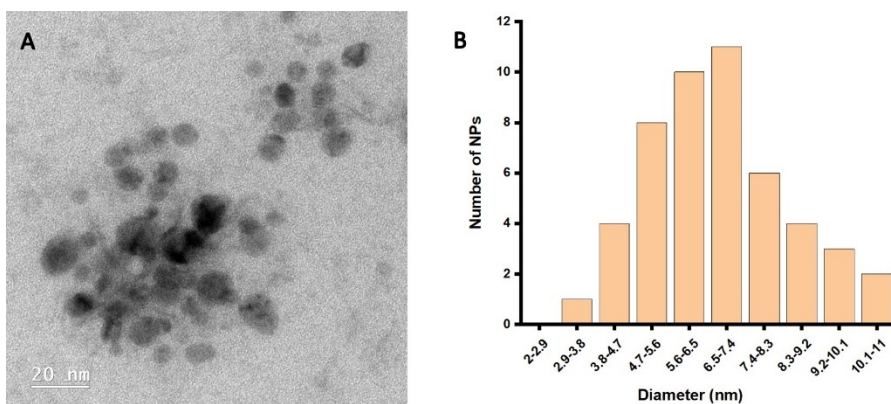

**Figure S 7.** TEM images and size distribution of the AuNPs\*.

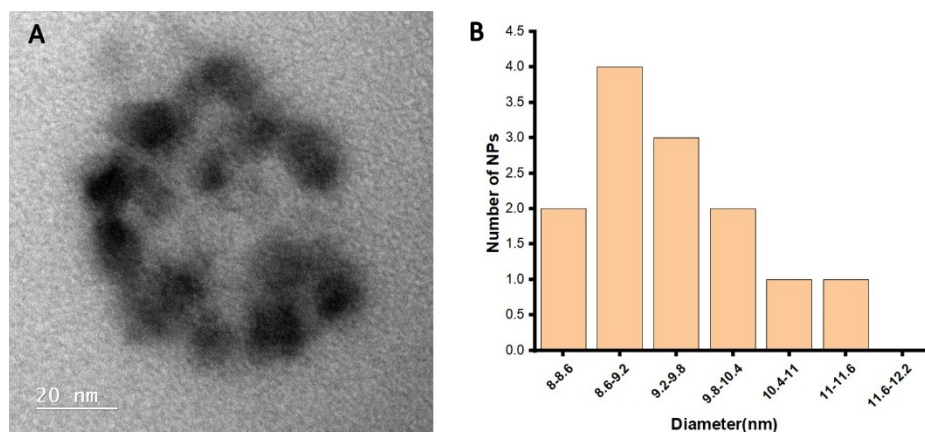

Figure S 8. TEM images and size distribution of the CuNPs\*.

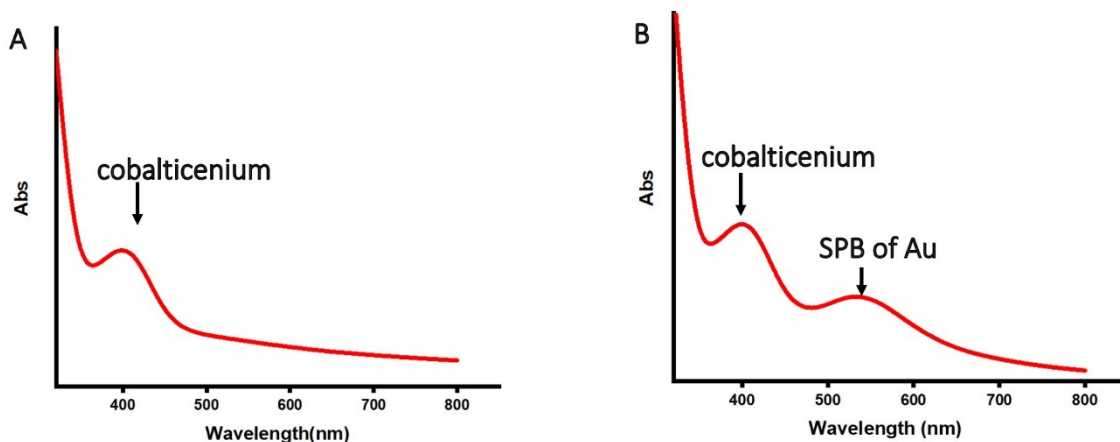

Figure S 9. UV-vis. spectra of RhNP\* (A), AuNP\* (B)

#### 4. H<sub>2</sub> evolution from B<sub>2</sub>(OH)<sub>4</sub> and AB hydrolysis catalysed by TMNP and TMNP\*

The catalytic hydrolysis of B<sub>2</sub>(OH)<sub>4</sub> was carried out at 20 ± 1 °C. In a typical experiment, 0.2 % mmol RhNP\* (5 ml H<sub>2</sub>O + 1 ml THF) was placed in a 50 ml round bottom flask with two outlets. Then, B<sub>2</sub>(OH)<sub>4</sub> (1 mmol, 90 mg) dissolved in 5 ml deionized water was added under vigorous stirring. The measurement of the produced H<sub>2</sub> gas was conducted in a typical water-filled gas burette.



The catalytic hydrolysis of AB was carried out at  $20 \pm 1$  °C. In a typical experiment, 0.2 % mmol RhNP\* (5 ml H<sub>2</sub>O + 1 ml THF) was placed in a 50ml round bottom flask with two outlets. Then, AB (1 mmol, 31 mg) dissolved in 1 ml deionized water was added under vigorous stirring. The measurement of the produced H<sub>2</sub> gas was conducted in a typical water-filled gas burette. The temperature of the reaction was measured using an electronic thermometer.

$$\ln k = -\frac{Ea}{RT} + \ln A \quad (\text{S4})$$

**Calculation of the TOF per surface atom:**

$$TOF_t = \frac{n_{H_2}}{n_{cat_t} \cdot time}$$

$$TOF_s = \frac{n_{H_2}}{n_{cat_s} \cdot time}$$

Where, TOF<sub>t</sub> is the turnover frequency of the total atoms. TOF<sub>s</sub> is the turnover frequency of the surface atoms.  $n_{H_2}$  is mole of produced H<sub>2</sub>. Time is reaction time (min).  $n_{cat_t}$  is mole of total atoms.  $n_{cat_s}$  is mole of surface atoms.

When number of surface atoms  $N_s$  and the number of total atoms  $N_t$  is introduced here,

$$\frac{n_{cat_s}}{n_{cat_t}} = \frac{N_s}{N_t}$$

On the other hand,

$$N_t = \frac{\frac{4}{3}\pi R_{NP}^3}{\frac{4}{3}\pi R_{atom}^3}$$

$$N_s = \frac{4\pi R_{NP}^2}{\pi R_{atom}^2}$$

Where  $R_{atom}$  is the radius of metal atom,  $R_{NP}$  is the radius of nanoparticles.

Thus,

$$TOF_s = \frac{TOF_t \cdot R_{NP}}{4R_{atom}}$$

**Table S 1.** TOF values of RhNP and RhNP\* in  $B_2(OH)_4$  and AB hydrolysis

|                   | $B_2(OH)_4$ |       | AB    |       |
|-------------------|-------------|-------|-------|-------|
|                   | RhNP        | RhNP* | RhNP  | RhNP* |
| NP diameter(nm)   | 3.0         | 2.5   | 3.0   | 2.5   |
| Atom diameter(nm) | 0.135       | 0.135 | 0.135 | 0.135 |
| TOF <sub>t</sub>  | 579         | 1364  | 165   | 125   |
| TOF <sub>s</sub>  | 3217        | 6315  | 917   | 578   |

the unit of TOF<sub>t</sub> and TOF<sub>s</sub> is  $\text{mol}_{H_2} \text{mol}_{cat}^{-1} \text{min}^{-1}$ .

**Table S 2.** Comparison of the catalytic performances of nanocatalysts in  $B_2(OH)_4$  hydrolysis

| Catalyst                            | Support                    | NPs loading | TOF <sup>a</sup> |
|-------------------------------------|----------------------------|-------------|------------------|
| RhNP*                               | pentamethylcobalticenicium | 0.2mol%     | 6315             |
| RhNP                                | cobalticenicium            | 0.2mol%     | 3217             |
| RhNP <sup>9</sup>                   | graphene quantum dots      | 0.4 mol‰    | 3658             |
| PtNP <sup>9</sup>                   | graphene quantum dots      | 0.4 mol‰    | 4603             |
| AuNP <sup>9</sup>                   | graphene quantum dots      | 0.4 mol‰    | 1698             |
| PdNP <sup>9</sup>                   | graphene quantum dots      | 0.4 mol‰    | 802              |
| IrNP <sup>9</sup>                   | graphene quantum dots      | 0.4mol ‰    | 185              |
| RuNP <sup>9</sup>                   | graphene quantum dots      | 0.4 mol‰    | 127              |
| Glucan-PtNP <sup>9</sup>            | Glucan                     | 0.4 mol‰    | 830              |
| TiO <sub>2</sub> -PtNP <sup>9</sup> | TiO <sub>2</sub>           | 3.66 wt %   | 681              |
| Pt/C <sup>9</sup>                   | Carbon                     | 5.0 wt %    | 300              |
| Rh@dendrimer <sup>10</sup>          | dendrimer                  | 0.1mol%     | 132              |

<sup>a</sup> TOF = TOF<sub>s</sub> = mol<sub>H<sub>2</sub></sub> produced / [surface mol<sub>cat</sub> × reaction time (min)] the unit is mol<sub>H<sub>2</sub></sub> mol<sub>cat</sub><sup>-1</sup> min<sup>-1</sup>.

**Table S 3.** Comparison of catalytic performance of RhNPs anchored on different supports in AB hydrolysis

| Catalyst                                                      | Support                        | NPs loading | TOF <sup>a</sup> |
|---------------------------------------------------------------|--------------------------------|-------------|------------------|
| RhNP*                                                         | pentamethylcobalticinium       | 0.2%        | 578              |
| RhNP                                                          | cobalticinium                  | 0.2%        | 917              |
| RhNPs/dendrimer <sup>11</sup>                                 | Dendrimer                      | 1%          | 244              |
| RhNPs/THPP <sup>12</sup>                                      | THPP                           | 0.2%        | 132              |
| GQDs -RhNPs <sup>13</sup>                                     | GQDs                           | 0.4%        | 642              |
| Rh <sub>1</sub> /VO <sub>2</sub> <sup>14</sup>                | VO <sub>2</sub> nanorods       | 0.2%        | 48               |
| Rh <sup>0</sup> /CeO <sub>2</sub> <sup>15</sup>               | CeO <sub>2</sub>               | 0.8%        | 2010             |
| Rh <sup>0</sup> /SiO <sub>2</sub> <sup>15</sup>               | SiO <sub>2</sub>               | 0.8%        | 112              |
| Rh <sup>0</sup> /Al <sub>2</sub> O <sub>3</sub> <sup>15</sup> | Al <sub>2</sub> O <sub>3</sub> | 0.8%        | 195              |
| Rh <sup>0</sup> /TiO <sub>2</sub> <sup>15</sup>               | TiO <sub>2</sub>               | 0.8%        | 105              |
| Rh <sup>0</sup> /ZrO <sub>2</sub> <sup>15</sup>               | ZrO <sub>2</sub>               | 0.8%        | 102              |
| Rh <sup>0</sup> /HfO <sub>2</sub> <sup>15</sup>               | HfO <sub>2</sub>               | 0.8%        | 24               |
| Rh(0)/CNT <sup>16</sup>                                       | CNT                            | 0.25%       | 706              |
| Rh/graphene <sup>17</sup>                                     | Graphene                       | 0.4%        | 325              |
| Rh(0)@TiO <sub>2</sub> <sup>18</sup>                          | TiO <sub>2</sub>               | 0.116%      | 260              |

<sup>a</sup> TOF = mol<sub>H<sub>2</sub></sub> produced / [surface mol<sub>cat</sub> × reaction time (min)], the unit is mol<sub>H<sub>2</sub></sub> mol<sub>cat</sub><sup>-1</sup> min<sup>-1</sup>.

## 5. Mechanistic studies of AB hydrolysis catalysed by RhNP\*

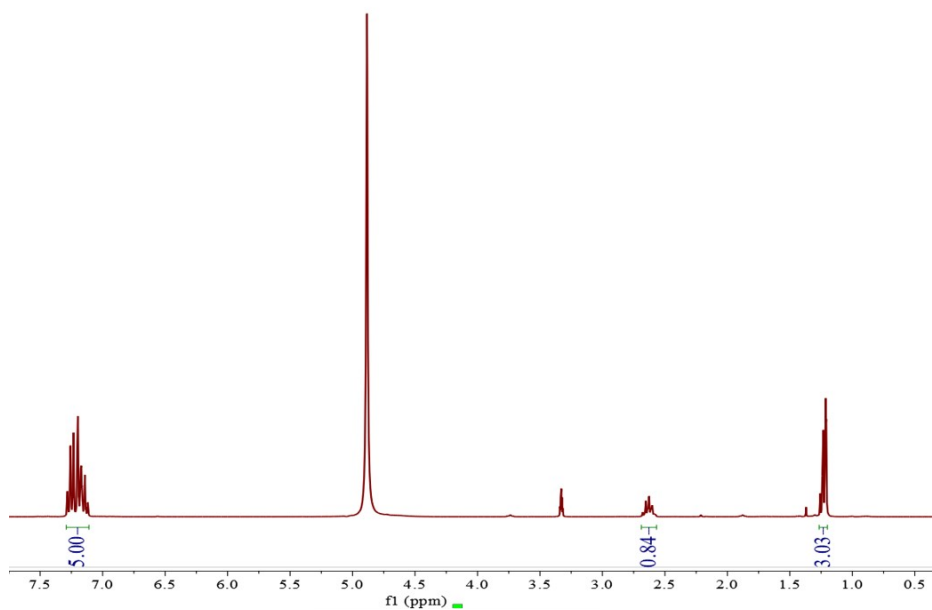

**Figure S 10.** <sup>1</sup>H NMR spectrum of the hydrogenation product of styrene in CD<sub>3</sub>OD. <sup>1</sup>H NMR (300 MHz, CD<sub>3</sub>OD) δ 7.12~7.28 ppm (CH-arom, 5.00H), 2.67~2.58ppm (-CH<sub>2</sub>, 0.84H), 1.21~1.25 ppm (-CH<sub>3</sub>, 3.03H).

## 6. References

- S1.V. Martinez, J.-C. Blais, G. Bravic and D. Astruc, Coupling Multiple Benzylic Activation of Simple Arenes by CpFe<sup>+</sup> with Multiple Alkene Metathesis Using Grubbs Catalysts: An Efficient Carbon–Carbon Bond Formation Strategy Leading to Polycycles, Cyclophanes, Capsules, and Polymeric Compounds and Their CpFe<sup>+</sup> Complexes, *Organometallics*, 2004, **23**, 861-874.
- S2.M. L. H. Green, L. Pratt and G. Wilkinson, 760. A new type of transition metal–cyclopentadiene compound, *Journal of the Chemical Society (Resumed)*, 1959, DOI: 10.1039/JR9590003753, 3753-3767.
- S3.R. K. Kochhar and R. Pettit, Cyclopentadieneiron tricarbonyl, *J. Organomet. Chem.*, 1966, **6**, 272-278.
- S4.K. Moseley, J. W. Kang and P. M. Maitlis, Pentamethylcyclopentadienyl-rhodium and -iridium halides. Part II. Reactions with mono-, di-, and tri-olefins, *J. Chem. Soc. A*, 1970, DOI: 10.1039/J19700002875, 2875-2883.
- S5.T. S. Piper and G. Wilkinson, Alkyl and aryl derivatives of  $\pi$ -cyclopentadienyl compounds of chromium, molybdenum, tungsten, and iron, *J. Inorg. Nucl. Chem.*, 1956, **3**, 104-124.
- S6.F. Fu, Q. Wang, R. Ciganda, A. M. Martinez-Villacorta, A. Escobar, S. Moya, E. Fouquet, J. Ruiz and D. Astruc, Electron- and Hydride-Reservoir Organometallics as Precursors of Catalytically Efficient Transition Metal Nanoparticles in Water, *Chem. Eur. J*, 2018, **24**, 6645-6653.
- S7.F. Fu, A. Dedieu, W. Wang, T. Chen, Y. Song, E. Fouquet, J. R. Hamon, M. Zhu and D. Astruc, Stabilization of a new nanocomposite family by reduction of gold nanoclusters with electron-reservoir complexes, *Chem. Commun.*, 2019, **55**, 10277-10280.
- S8.L. P. Szajek and J. R. Shapley, Unexpected synthesis of CpIr(.eta.<sup>4</sup>-C<sub>5</sub>H<sub>6</sub>) and a proton and carbon-13 NMR comparison with its cobalt and rhodium congeners, *Organometallics*, 1991, **10**, 2512-2515.
- S9.W. Chen, J. Shen, Y. Huang, X. Liu and D. Astruc, Catalyzed Hydrolysis of Tetrahydroxydiboron by Graphene Quantum Dot-Stabilized Transition-Metal Nanoparticles for Hydrogen Evolution, *ACS Sustain. Chem. Eng.*, 2020, **8**, 7513-7522.

- S10. Q. Zhao, N. Kang, M. Martínez Moro, E. Guisasola, S. Moya, E. Coy, L. Salmon, X. Liu and D. Astruc, Sharp Volcano-Type Synergy and Visible Light Acceleration in H<sub>2</sub> Release upon B<sub>2</sub>(OH)<sub>4</sub> Hydrolysis Catalyzed by Au-Rh@Click-Dendrimer Nanozymes, *ACS A.E.M.*, 2022, **5**, 3834–3844.
- S11. Q. Wang, F. Fu, A. Escobar, S. Moya, J. Ruiz and D. Astruc, “Click” Dendrimer-Stabilized Nanocatalysts for Efficient Hydrogen Release upon Ammonia-Borane Hydrolysis, *ChemCatChem*, 2018, **10**, 2673-2680.
- S12. N. Zhang, G. Liu, Y. Sun, Y. Wang, J. Yan and X. Liu, H<sub>2</sub> Evolution Upon Hydrolysis of Ammonia-Borane Catalyzed by Porphyrin Stabilized Nanocatalysts, *Catal. Lett.*, 2021, **151**, 2272-2278.
- S13. J. Shen, W. Chen, G. Lv, Z. Yang, J. Yan, X. Liu and Z. Dai, Hydrolysis of NH<sub>3</sub>BH<sub>3</sub> and NaBH<sub>4</sub> by graphene quantum dots-transition metal nanoparticles for highly effective hydrogen evolution, *Int. J. Hydrog. Energy*, 2021, **46**, 796-805.
- S14. L. Wang, H. Li, W. Zhang, X. Zhao, J. Qiu, A. Li, X. Zheng, Z. Hu, R. Si and J. Zeng, Supported Rhodium Catalysts for Ammonia–Borane Hydrolysis: Dependence of the Catalytic Activity on the Highest Occupied State of the Single Rhodium Atoms, *Angew. Chem. Int. Ed.*, 2017, **56**, 4712-4718.
- S15. S. Akbayrak, Y. Tonbul and S. Özkar, Ceria supported rhodium nanoparticles: Superb catalytic activity in hydrogen generation from the hydrolysis of ammonia borane, *Appl. Catal. B*, 2016, **198**, 162-170.
- S16. D. W. Himmelberger, C. W. Yoon, M. E. Bluhm, P. J. Carroll and L. G. Sneddon, Base-Promoted Ammonia Borane Hydrogen-Release, *J. Am. Chem. Soc.*, 2009, **131**, 14101-14110.
- S17. J. Shen, L. Yang, K. Hu, W. Luo and G. Cheng, Rh nanoparticles supported on graphene as efficient catalyst for hydrolytic dehydrogenation of amine boranes for chemical hydrogen storage, *Int. J. Hydrog. Energy*, 2015, **40**, 1062-1070.
- S18. S. Akbayrak, S. Gençtürk, İ. Morkan and S. Özkar, Rhodium(0) nanoparticles supported on nanotitania as highly active catalyst in hydrogen generation from the hydrolysis of ammonia borane, *RSC Adv.*, 2014, **4**, 13742-13748.
